# Supplementary material for: Prevalence of Malaria and Chikungunya Co-Infection in Febrile Patients: A Systematic Review and Meta-Analysis
Source: MDPI journal article supplement (doi:10.3390/tropicalmed6030119), 2021-06-30
Supplement: s1 [file s1]

## Prevalence of malaria and Chikungunya co-infection among febrile patients: a systematic review and meta-analysis

Wanida Mala<sup>1</sup>, Polrat Wilairatana<sup>2</sup>, Kwuntida Uthaisar Kotepui<sup>1</sup>, Manas Kotepui<sup>1\*</sup>

<sup>1</sup>Medical Technology, School of Allied Health Sciences, Walailak University, Tha Sala, Nakhon Si Thammarat, Thailand

<sup>2</sup>Department of Clinical Tropical Medicine, Faculty of Tropical Medicine, Mahidol University, Bangkok, Thailand

### \*Corresponding author

Manas Kotepui; [manas.ko@wu.ac.th](mailto:manas.ko@wu.ac.th), Tel.: +66954392469

Wanida Mala; [wanida.ma@wu.ac.th](mailto:wanida.ma@wu.ac.th)

Polrat Wilairatana; [polrat.wil@mahidol.ac.th](mailto:polrat.wil@mahidol.ac.th)

Kwuntida Uthaisar Kotepui; [kwuntida.ut@wu.ac.th](mailto:kwuntida.ut@wu.ac.th)

| No. | Authors               | Eligibility criteria | Study subjects and the setting | Exposure measured in a valid and reliable way 'gold standard' | A specified diagnosis or definition | Confounding factors | Dealing with confounding factors | Outcomes measured in a valid and reliable way | Appropriate statistical analysis | Scores (8) | Risk of bias (high, moderate, low) |
|-----|-----------------------|----------------------|--------------------------------|---------------------------------------------------------------|-------------------------------------|---------------------|----------------------------------|-----------------------------------------------|----------------------------------|------------|------------------------------------|
| 1   | Ayorinde et al., 2016 | Yes                  | Yes                            | No                                                            | Yes                                 | No                  | NA                               | Yes                                           | Yes                              | 6          | Moderate                           |
| 2   | Baba et al., 2013     | Yes                  | Yes                            | No                                                            | Yes                                 | No                  | NA                               | Yes                                           | Yes                              | 6          | Moderate                           |
| 3   | Bower et al., 2021    | Yes                  | Yes                            | No                                                            | Yes                                 | No                  | NA                               | Yes                                           | Yes                              | 6          | Moderate                           |
| 4   | Chipwaza et al., 2014 | Yes                  | Yes                            | No                                                            | Yes                                 | No                  | NA                               | Yes                                           | Yes                              | 6          | Moderate                           |

|    |                          |     |     |     |     |    |    |     |     |   |          |
|----|--------------------------|-----|-----|-----|-----|----|----|-----|-----|---|----------|
| 5  | Dariano et al., 2017     | Yes | No  | No  | Yes | No | NA | Yes | Yes | 6 | Moderate |
| 6  | Forero-Peña et al., 2021 | Yes | Yes | No  | Yes | No | NA | Yes | Yes | 6 | Moderate |
| 7  | Kinimi et al., 2018      | Yes | Yes | No  | Yes | No | NA | Yes | Yes | 6 | Moderate |
| 8  | Mugabe et al., 2018      | Yes | Yes | No  | Yes | No | NA | Yes | Yes | 6 | Moderate |
| 9  | Sow et al., 2016         | Yes | Yes | Yes | Yes | No | NA | Yes | Yes | 7 | Low      |
| 10 | Waggoner et al., 2017    | Yes | Yes | Yes | Yes | No | NA | Yes | Yes | 7 | Low      |

NA, Not Applicable
