# Supplementary material for: Prevalence of Malaria and Chikungunya Co-Infection in Febrile Patients: A Systematic Review and Meta-Analysis
Source: MDPI journal article supplement (doi:10.3390/tropicalmed6030119), 2021-06-30
Supplement: s1 [file s1]

**Prevalence of malaria and Chikungunya co-infection among febrile patients: a systematic review and meta-analysis**

Wanida Mala<sup>1</sup>, Polrat Wilairatana<sup>2</sup>, Kwuntida Uthaisar Kotepui<sup>1</sup>, Manas Kotepui<sup>1\*</sup>

<sup>1</sup>Medical Technology, School of Allied Health Sciences, Walailak University, Tha Sala, Nakhon Si Thammarat, Thailand

<sup>2</sup>Department of Clinical Tropical Medicine, Faculty of Tropical Medicine, Mahidol University, Bangkok, Thailand

**\*Corresponding author**

Manas Kotepui; [manas.ko@wu.ac.th](mailto:manas.ko@wu.ac.th), Tel.: +66954392469

Wanida Mala; [wanida.ma@wu.ac.th](mailto:wanida.ma@wu.ac.th)

Polrat Wilairatana; [polrat.wil@mahidol.ac.th](mailto:polrat.wil@mahidol.ac.th)

Kwuntida Uthaisar Kotepui; [kwuntida.ut@wu.ac.th](mailto:kwuntida.ut@wu.ac.th)

**Table S1. Search term.**

| Databases          | Search Terms/Search Strategy                                                                               | Date        |
|--------------------|------------------------------------------------------------------------------------------------------------|-------------|
| MEDLINE            | (Malaria OR plasmodium) AND Chikungunya<br>Search results: 441                                             | 29 May 2021 |
| Scopus             | (Malaria OR plasmodium) AND Chikungunya<br>Search option: Title, abstract, keywords<br>Search results: 876 | 29 May 2021 |
| ISI Web of Science | (Malaria OR plasmodium) AND Chikungunya                                                                    | 29 May 2021 |

|  |                           |  |
|--|---------------------------|--|
|  | Search option: All fields |  |
|  | Search results: 607       |  |
